# Supplementary material
Source: publisher site journal article supplement (https://www.spandidos-publications.com/7618/downloadSupplementary)

Figure S1. Transfection efficiency of miR-590-3p mimics in MDA-MB-231 cells. \*\*\*P<0.001 vs. miR-NC. miR, microRNA; NC, negative control.

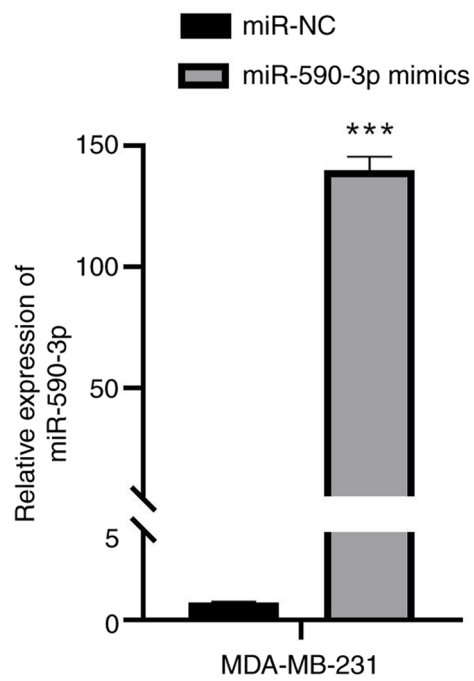

Figure S2. Correlation between circEFR3A and AR expression. Circ, circular; AR, androgen receptor.

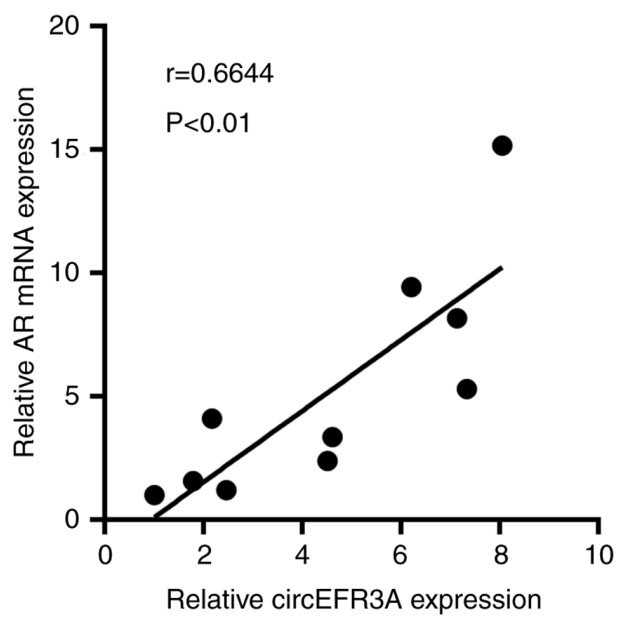

Supplement: Supplementary file 1 [file downloadSupplementary]
